# Supplementary figures and images for: DRF 3188 a novel semi-synthetic analog of andrographolide: cellular response to MCF 7 breast cancer cells
Source: Springer Nature journal article supplement (doi:10.1186/1471-2407-4-26), 2004-06-18

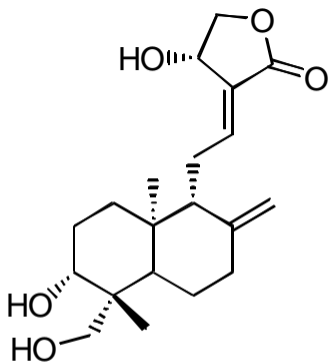

Andrographolide

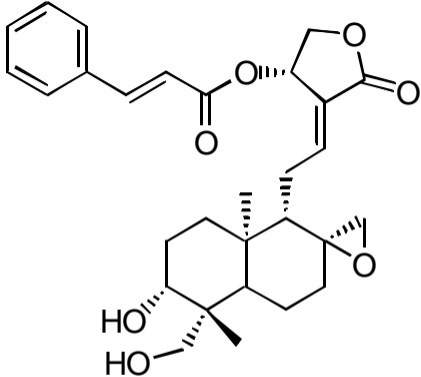

DRF 3188

Supplement: 12885_2003_116_MOESM1_ESM.pdf [file 12885_2003_116_MOESM1_ESM.pdf]
